# Supplementary material for: A novel ratiometric AIE-based fluorescent probe for specific detection of Hcy/Cys and imaging of living cells in vivo
Source: Royal Society of Chemistry journal article supplement (doi:10.1039/d1nj03606h), 2021-01-01
Supplement: d1nj03606h1.pdf [file d1nj03606h1.pdf]

## **Electronic Supplementary Material (ESI) for New Journal of Chemistry.**

### **Electronic Supplementary Information (ESI)**

#### **A novel ratiometric fluorescence probe with AIE-based for specific detection of Hcy/Cys and imaging of living cells in vivo**

Hong-Min Lv,<sup>a</sup> Zi-Ke Jiang<sup>\*a</sup>, Jing Wang,<sup>b</sup> Tao Wang,<sup>b</sup> Xiao-Nan Zhang,<sup>c</sup> Yi-Meng Hu<sup>c</sup> and Yan-Yan Ma<sup>\*a</sup>

<sup>a</sup> Institute of Oceanographic Instrumentation, Qilu University of Technology (Shandong Academy of Sciences), Qingdao, Shandong, 266061, P. R. China. Email: Jiangzike2011@126.com, myy\_m5@163.com

<sup>b</sup> Shandong Provincial Key Laboratory of Marine monitoring instrument equipment technology, Qingdao, Shandong, 266061, P. R. China.

<sup>c</sup> National Engineering and Technological Research Center of Marine Monitoring Equipment, Qingdao, Shandong, 266061, P. R. China.

Table S1 Fluorescent probes based on TPE ligands for the selective detection of biothiols (individually or in pairs)

| Probe                                                                              | Selectivity | Type        | detection limit | Biological system | Ref.    |
|------------------------------------------------------------------------------------|-------------|-------------|-----------------|-------------------|---------|
| 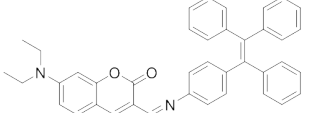  | Cys+Hcy     | Turn-on     | 5 $\mu$ m       | No study          | [16g]   |
|   | Hcy         | Ratiometric | 0.346 $\mu$ m   | No study          | [16b]   |
|   | Cys         | turn-on     | 0.18 $\mu$ m    | HeLa cells        | [16f]   |
|  | Cys         | Ratiometric | 25 $\mu$ m      | HepG2 cells       | Ref.16h |

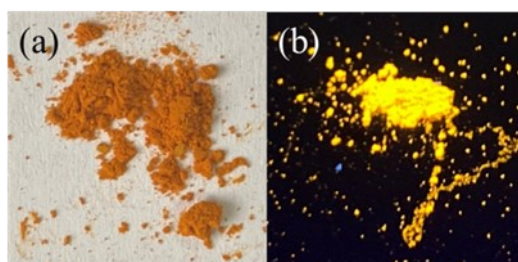

Fig.S1 Color of the probe powder under visible light (a) and UV light (b).

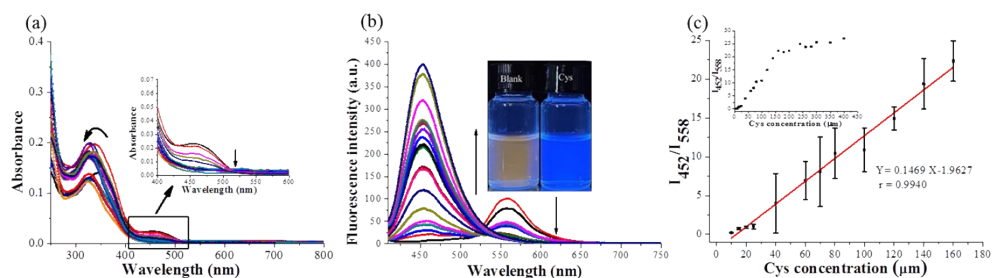

Fig.S2 (a) Absorption spectra of probe (10  $\mu$ M) upon addition of increasing concentrations of Cys (0–400  $\mu$ M) in  $\text{CH}_3\text{CN}$ /phosphate buffer (3:7 v/v, 20 mM, pH 7.4) for 35 min. (b) Fluorescence spectra of probe (10  $\mu$ M) upon addition of increasing concentrations of Cys (0–400  $\mu$ M) in

acetonitrile/phosphate buffer (3:7 v/v, 20mM, pH 7.4) for 35min. The inset shows fluorescence changes of 1 in the absence and presence of Cys under UV light at 365 nm.(c)Linear plot of the emission ratio ( $I_{452}/I_{558}$ ) against Cys concentration (10–160  $\mu\text{M}$ ) when using probe(10  $\mu\text{M}$ ). The inset shows the emission ratio ( $I_{452}/I_{558}$ ) as a function of Cys concentration.

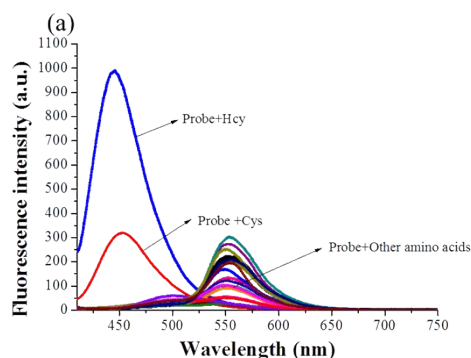

Fig.S3 Fluorescence responses of Probe (10 $\mu\text{M}$ ) to 300  $\mu\text{M}$  of different amino acids in  $\text{CH}_3\text{CN}$ /phosphate buffer (3:7 v/v, 20mM, pH 7.4)

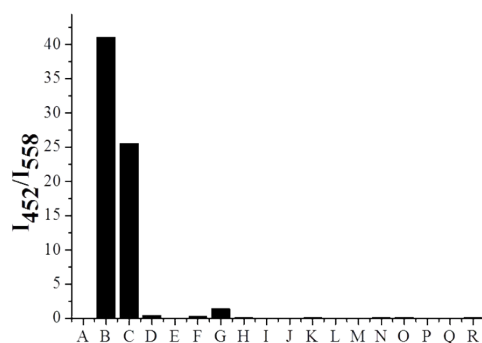

Fig.S4 The emission ratio  $I_{452}/I_{558}$  of Probe (10  $\mu\text{M}$ ) in the presence of other analytes. (A) Blank, (B) Hcy, (C) cys, (D) Cystine, (E) 3-Mercaptopropionic acid, (F)  $\text{SO}_3^{2-}$ , (G)  $\text{HS}^-$ , (H)  $\text{Al}^{3+}$ , (I)  $\text{Br}^-$ , (J)  $\text{C}_2\text{O}_4^{2-}$ , (K)  $\text{Ca}^{2+}$ , (L)  $\text{F}^-$ , (M)  $\text{K}^+$ , (N)  $\text{Mg}^{2+}$ , (O)  $\text{S}_2\text{O}_3^{2-}$ , (P)  $\text{SO}_4^{2-}$ , (Q) ascorbic acid, (R)  $\text{Zn}^{2+}$

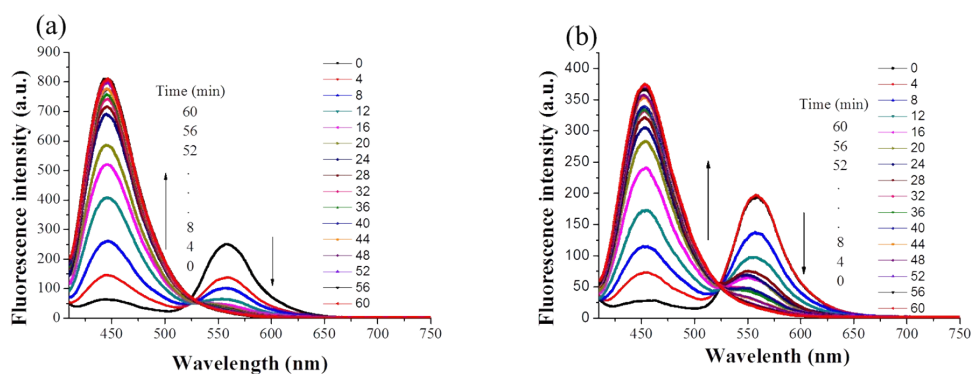

Fig.S5 Time-dependent fluorescence spectra of probe (10  $\mu\text{M}$ ) with 30 equiv. of Hcy (a) and Cys (b)

Spectrum from 20210411-POS-ZJ-5.wiff (sample ... iment 1, +TOF MS (100 - 1500) from 0.164 min

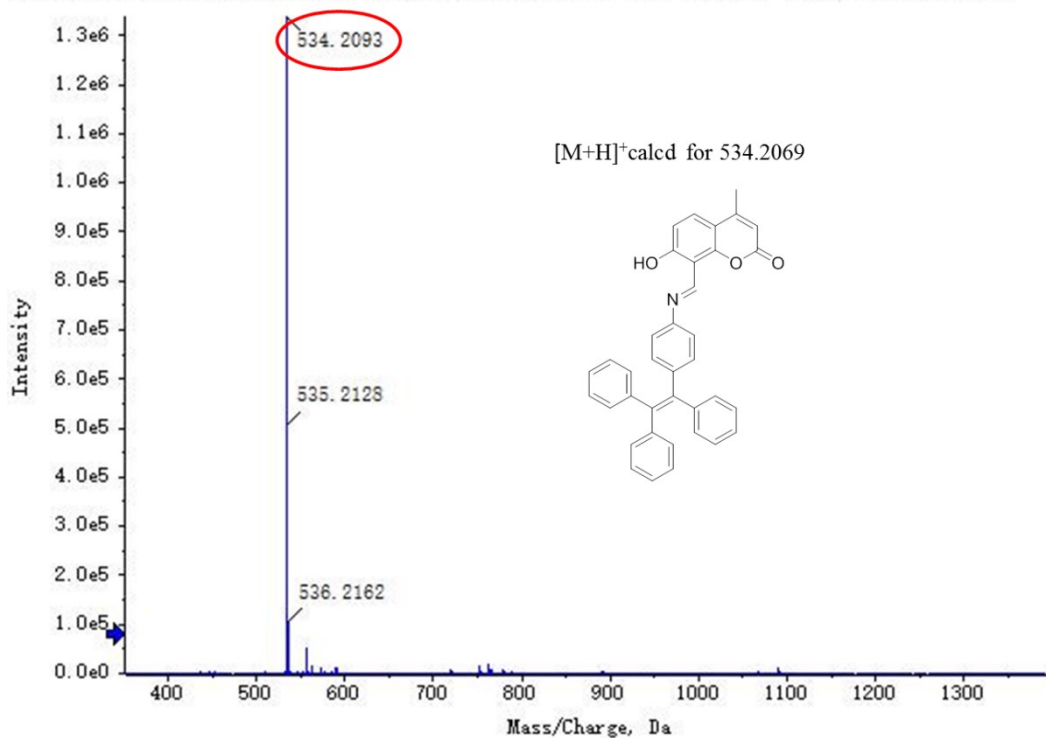

Fig.S6 HRMS spectrum of probe in CH<sub>3</sub>OH

20210407-0406-M-1-HNMR  
HNMR

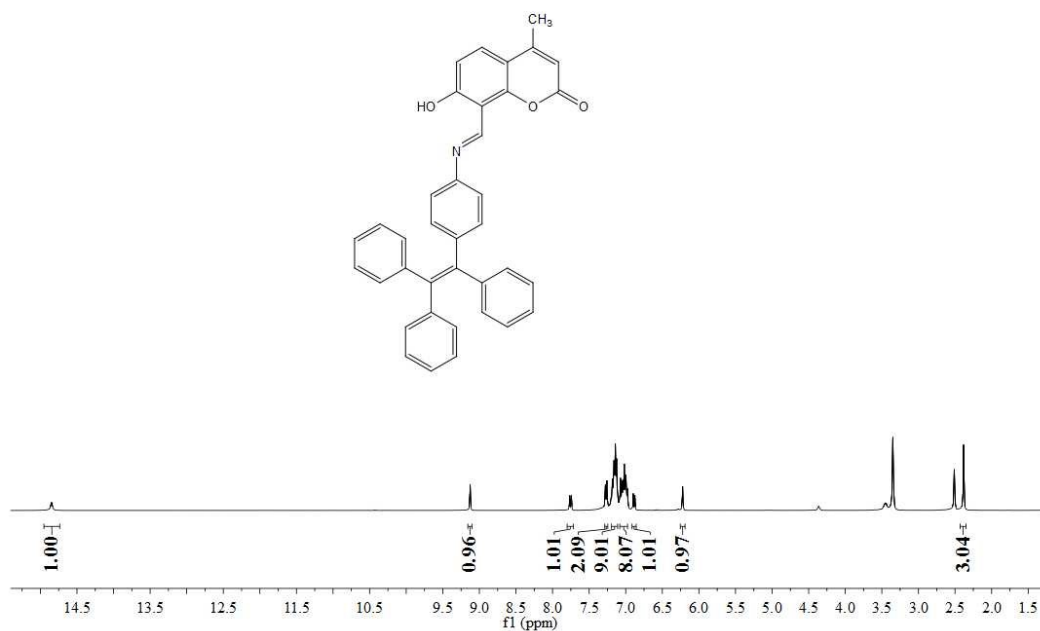

Fig.S7 <sup>1</sup>H-NMR spectrum of probe in DMSO-d<sub>6</sub>

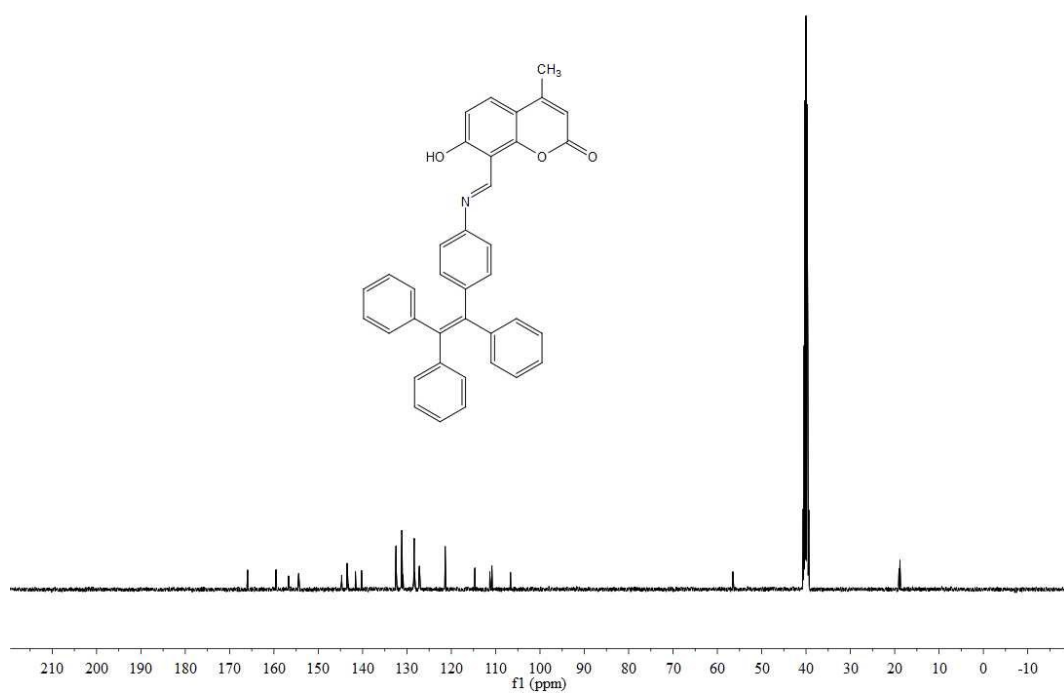

Fig.S8  $^{13}\text{C}$ -NMR spectrum of probe in DMSO-d<sub>6</sub>

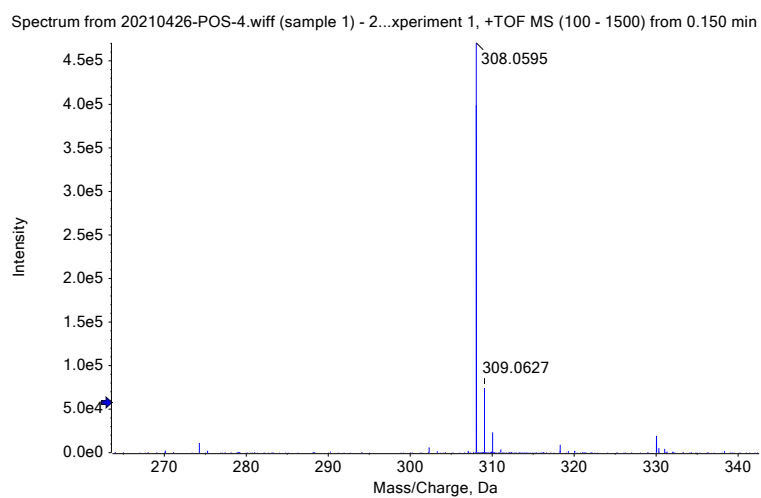

Fig.S9 HRMS spectrum of condensation product of **1** with Cys

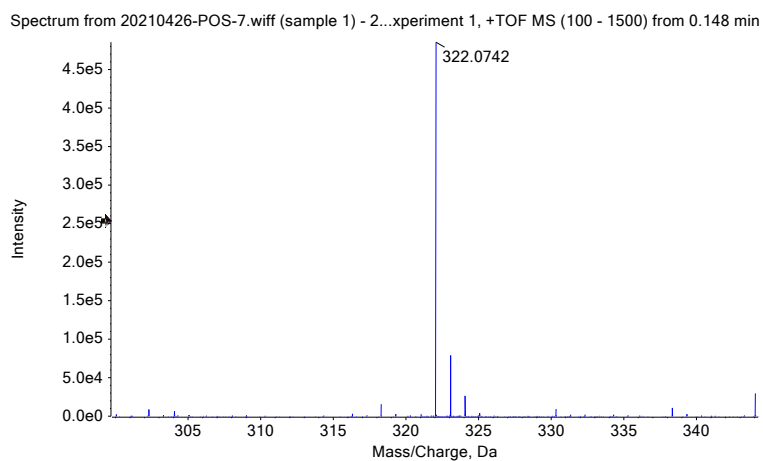

Fig.S10 HRMS spectrum of condensation product of 1 with HCy

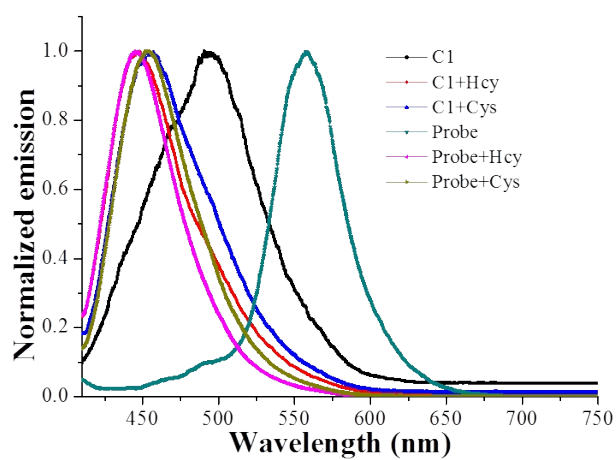

Fig.S11 Normalized fluorescence spectra of Probe and C1 (10  $\mu$ M) in absence and presence of Hcy/Cys (300  $\mu$ M) in acetonitrile/phosphate buffer (3:7 v/v, 20mM, pH 7.4)

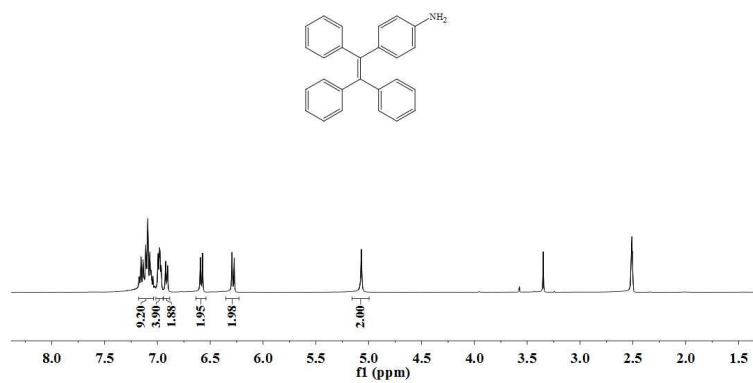

Fig.S12 <sup>1</sup>H-NMR spectrum of TPE-NH<sub>2</sub> in DMSO-d<sub>6</sub>

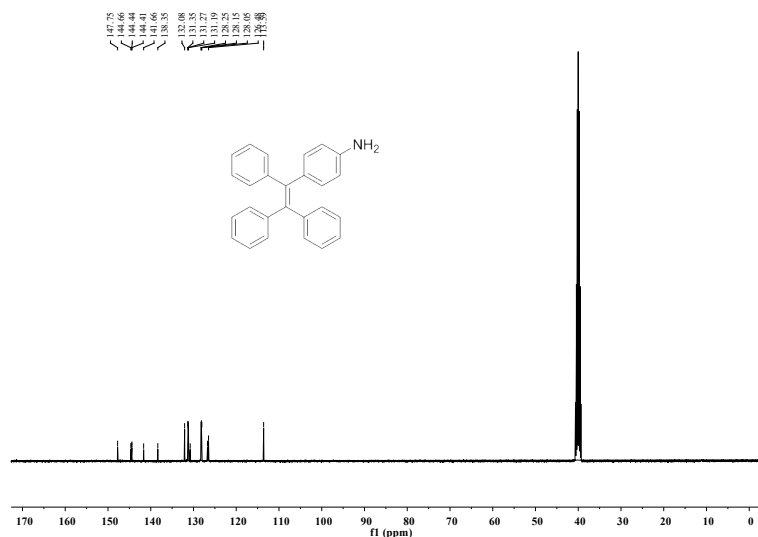

Fig.S13 <sup>13</sup>C-NMR spectrum of TPE-NH<sub>2</sub> in DMSO-d<sub>6</sub>  
 Spectrum from 20210411-POS-ZJ-5.wiff (sample 1...riment 1, +TOF MS (100 - 1500) from 0.134 min

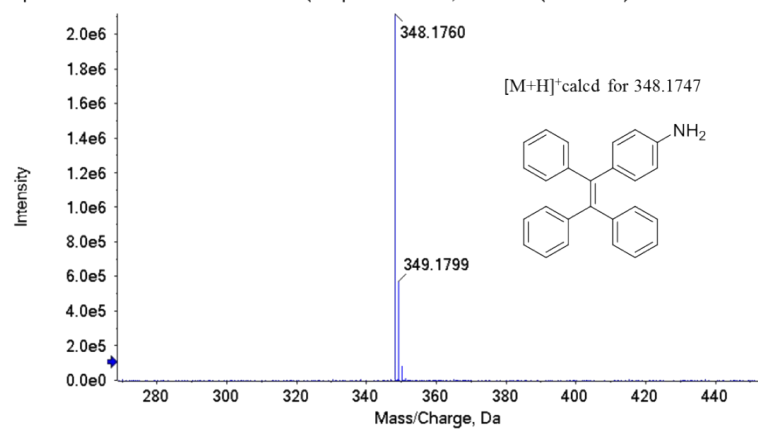

Fig.S14 HRMS spectrum of TPE-NH<sub>2</sub> in CH<sub>3</sub>OH

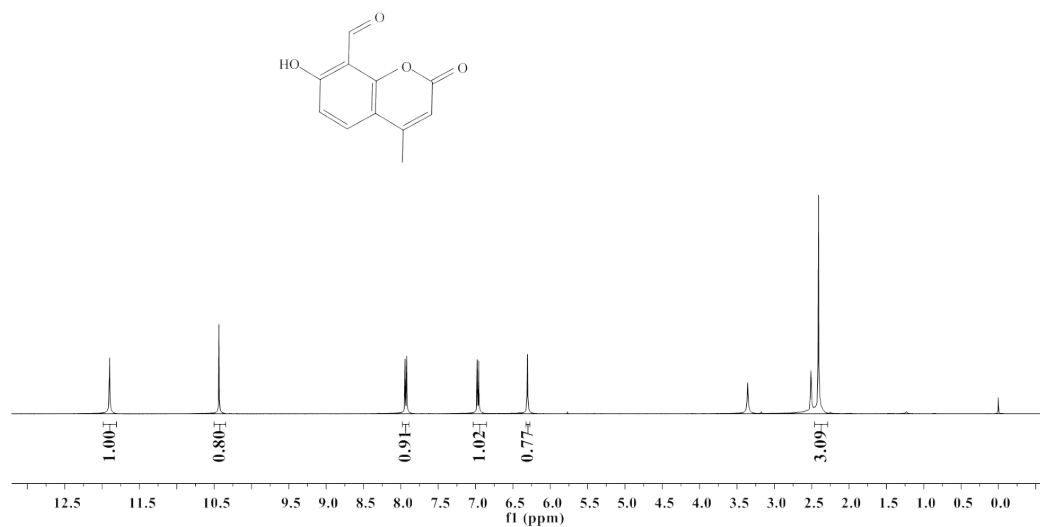

Fig.S15 <sup>1</sup>H-NMR spectrum of C1 in DMSO-d6

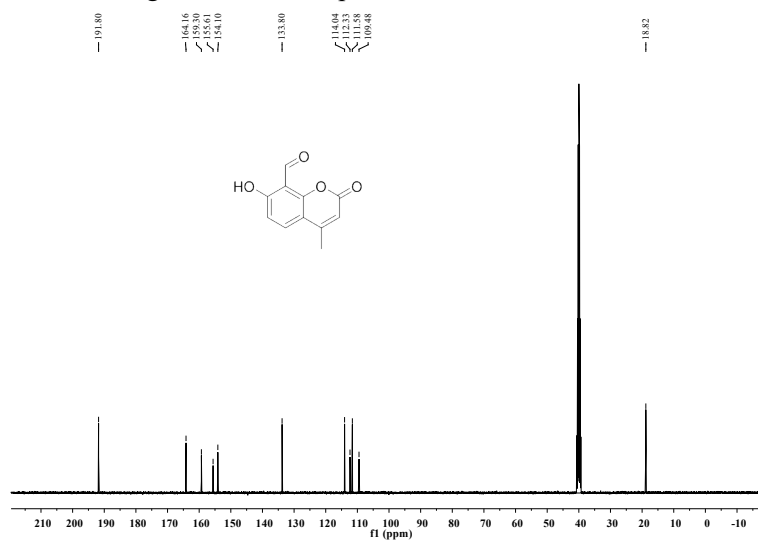

Fig.S16 <sup>13</sup>C-NMR spectrum of C1 in DMSO-d6

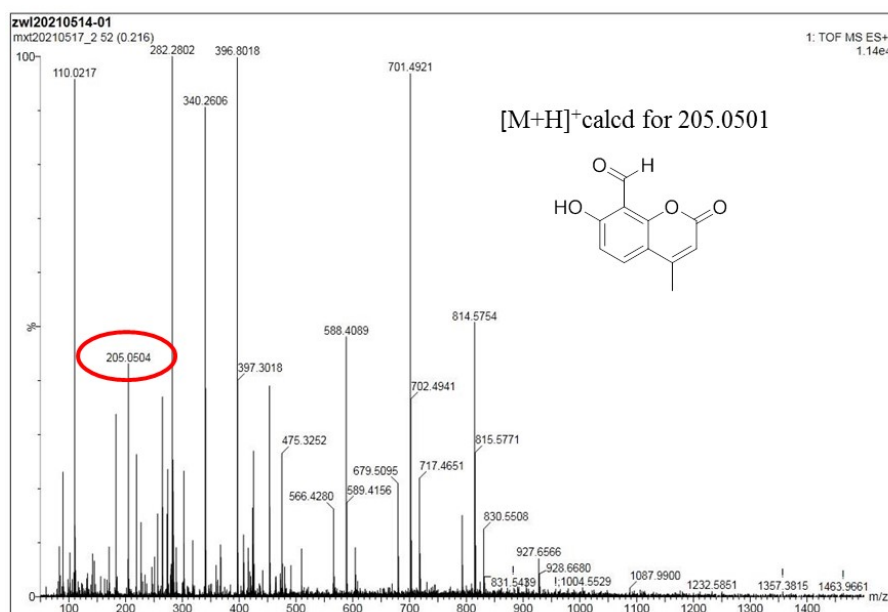

Fig.S17 HRMS spectrum of C1 in CH<sub>3</sub>OH
